# Supplementary material for: Extended Post-Curing Light Exposure and Sandblasting Effects on Surface Hydrophobicity of 3D-Printed Denture Base Resin
Source: MDPI journal article supplement (doi:10.3390/prosthesis4010009), 2022-02-16
Supplement: s1 [file s1]

## Supplemental Information

**Table S1.** Surface roughness parameters values for the 3 groups' samples, averages, standard deviation, and T-test results. Con: Control, ExCu: Extended cure, STDEV: standard deviation.

|                    | Sa       | Sz       | Str      | Spc      | Sdr      |
|--------------------|----------|----------|----------|----------|----------|
| Control1           | 5.003    | 109.72   | 0.149    | 4.21E+08 | 4.17E+05 |
| Control2           | 5.417    | 110.1155 | 0.035773 | 4.78E+08 | 5.40E+05 |
| Control3           | 4.132    | 76.7042  | 0.028221 | 3.6E+08  | 2.86E+05 |
| Control4           | 5.208    | 128.3978 | 0.422913 | 5.14E+08 | 6.54E+05 |
| Control5           | 5.028    | 101.0039 | 0.122713 | 4.24E+08 | 4.21E+05 |
| Control6           | 4.123    | 99.449   | 0.414346 | 4.47E+08 | 4.78E+05 |
| Control7           | 4.311    | 98.0172  | 0.054954 | 4.21E+08 | 4.03E+05 |
| Control8           | 4.809    | 105.3002 | 0.091678 | 4.7E+08  | 5.29E+05 |
| Control9           | 4.095    | 73.8172  | 0.147736 | 4.13E+08 | 3.85E+05 |
| Control10          | 4.295    | 97.1977  | 0.320823 | 4.8E+08  | 5.41E+05 |
| Average            | 4.6421   | 99.97227 | 0.178816 | 4.43E+08 | 4.65E+05 |
| STDEV              | 4.78E-01 | 1.51E+01 | 1.44E-01 | 4.20E+07 | 9.89E+04 |
| ExCure1            | 5.883    | 118.366  | 0.023    | 4.7E+08  | 5.18E+05 |
| ExCure2            | 5.709    | 121.71   | 0.026598 | 4.65E+08 | 5.16E+05 |
| ExCure3            | 4.871    | 84.1376  | 0.022882 | 3.93E+08 | 3.49E+05 |
| ExCure4            | 3.974    | 119.5762 | 0.158046 | 3.8E+08  | 3.17E+05 |
| ExCure5            | 5.544    | 119.445  | 0.316857 | 5.23E+08 | 6.70E+05 |
| ExCure6            | 3.971    | 119.445  | 0.316857 | 5.23E+08 | 6.70E+05 |
| ExCure7            | 3.389    | 66.68959 | 0.600875 | 4.42E+08 | 4.56E+05 |
| ExCure8            | 3.849    | 70.7571  | 0.586645 | 4.13E+08 | 3.83E+05 |
| ExCure9            | 5.023    | 77.2989  | 0.452087 | 4.45E+08 | 4.51E+05 |
| ExCure10           | 4.305    | 127.7435 | 0.622939 | 5.29E+08 | 6.72E+05 |
| Average            | 4.6518   | 102.5168 | 0.312716 | 4.58E+08 | 5.00E+05 |
| STDEV              | 0.830524 | 23.20798 | 0.23394  | 51398776 | 127228.9 |
| T-test(ConVs ExCu) | 0.48524  | 0.358064 | 0.079038 | 0.250065 | 0.267128 |
| Sandblast1         | 3.007    | 40.762   | 0.896    | 3.63E+08 | 3.48E+05 |
| Sandblast2         | 2.824    | 38.736   | 0.948    | 3.43E+08 | 3.10E+05 |
| Sandblast3         | 4.398    | 56.343   | 0.681    | 4.86E+08 | 6.22E+05 |
| Sandblast4         | 4.605    | 61.524   | 0.158    | 4.04E+08 | 4.23E+05 |
| Sandblast5         | 3.951    | 52.128   | 0.766111 | 4.28E+08 | 4.69E+05 |
| Sandblast6         | 1.315    | 19.2899  | 0.977124 | 1.07E+07 | 5.01E+02 |
| Sandblast7         | 3.116    | 61.7932  | 0.951441 | 3.36E+08 | 2.87E+05 |
| Sandblast8         | 3.177    | 35.8898  | 0.876957 | 3.41E+08 | 3.00E+05 |
| Sandblast9         | 3.194    | 43.9734  | 0.967027 | 3.63E+08 | 3.45E+05 |
| Sandblast10        | 4.112    | 45.5346  | 0.95439  | 4.75E+08 | 5.99E+05 |
| Sandblast11        | 3.842    | 47.2777  | 0.905566 | 4.3E+08  | 4.91E+05 |
| Sandblast12        | 3.672    | 49.5226  | 0.94756  | 3.93E+08 | 3.99E+05 |

|             |          |          |          |          |          |
|-------------|----------|----------|----------|----------|----------|
| Sandblast13 | 3.431    | 51.4182  | 0.953555 | 4.37E+08 | 5.17E+05 |
| Sandblast14 | 3.672    | 44.799   | 0.934846 | 3.52E+08 | 3.18E+05 |
| Average     | 3.434417 | 46.06457 | 0.835736 | 3.64E+08 | 3.83E+05 |
| T-test      | 0.001471 | 6.74E-06 | 0.000105 | 0.043982 | 0.102481 |
| STDEV       | 0.81205  | 11.01811 | 0.216373 | 1.14E+08 | 156120.2 |
|             | 0.782511 | 10.61731 | 0.208503 | 1.1E+08  | 150441.2 |

**Table S2.** The contact angle measurements for all 3 groups samples, including the following information: the frame number, time (s), left and right angles (°), left and right root mean squared error (RMSE), left and right contact points (pixels), and droplet width (pixels), Con: Control, ExCu: Extended cure, STDEV: standard deviation.

|            | Frame Number | Time (s) | Left Angle (°) | Right Angle (°) | Average Angle (°) | Left RMSE | Right RMSE | Left Contact Point (Pixel) | Right Contact Point (Pixel) | Droplet Width (Pixels) |
|------------|--------------|----------|----------------|-----------------|-------------------|-----------|------------|----------------------------|-----------------------------|------------------------|
| Control 1  | 150          | 30       | 88.93          | 80.63           | 84.78             | 0.814194  | 0.565475   | 752.9                      | 1284.4                      | 531.5                  |
| Control 2  | 150          | 30       | 67.87          | 77.21           | 72.54             | 0.791732  | 0.59381    | 742.9                      | 1341.5                      | 598.6                  |
| Control 3  | 150          | 30       | 97.18          | 57.24           | 77.21             | 0.863658  | 0.688115   | 439.1                      | 1014.6                      | 575.5                  |
| Control 4  | 150          | 30       | 76.22          | 78.5            | 77.36             | 0.928148  | 0.607052   | 491.3                      | 1030.2                      | 538.9                  |
| Control 5  | 150          | 30       | 84.81          | 78.74           | 81.78             | 0.534852  | 0.766377   | 463.8                      | 1061.9                      | 598.1                  |
| Control 6  | 150          | 30       | 75.24          | 76.17           | 75.71             | 0.542443  | 0.46188    | 829.3                      | 1419.3                      | 590                    |
| Control 7  | 150          | 30       | 70.33          | 86.28           | 78.3              | 0.565872  | 0.293029   | 794.7                      | 1437.8                      | 643.1                  |
| Control 8  | 150          | 30       | 87.17          | 78.31           | 82.74             | 0.515302  | 0.493882   | 1110.2                     | 1671.1                      | 560.9                  |
| Control 9  | 150          | 30       | 83.84          | 81.86           | 82.85             | 0.595419  | 0.559916   | 419.4                      | 920.2                       | 500.8                  |
| Control 10 | 150          | 30       | 85.87          | 80.77           | 83.32             | 0.503361  | 0.735458   | 594.9                      | 1188.5                      | 593.6                  |
| Control 11 | 150          | 30       | 81.23          | 89.57           | 85.4              | 0.923384  | 0.617595   | 506.4                      | 1080.9                      | 574.5                  |
| Control 12 | 150          | 30       | 86.96          | 87.14           | 87.05             | 0.559454  | 0.913688   | 828.4                      | 1354.9                      | 526.5                  |
| Control 13 | 150          | 30       | 82.43          | 74.37           | 78.4              | 0.693619  | 0.655486   | 852.4                      | 1475.4                      | 623                    |
| Control 14 | 150          | 30       | 80.54          | 87.18           | 83.86             | 0.430092  | 0.445971   | 811.5                      | 1430                        | 618.5                  |
| Control 15 | 150          | 30       | 78.32          | 77.57           | 77.94             | 0.485038  | 0.440773   | 463.4                      | 1122.8                      | 659.4                  |
| Control 16 | 150          | 30       | 77.13          | 82.02           | 79.57             | 0.872137  | 0.428452   | 508.6                      | 1113.9                      | 605.3                  |
| Control 17 | 150          | 30       | 83.18          | 81.3            | 82.24             | 0.545933  | 0.399116   | 613.6                      | 1178.3                      | 564.7                  |
| Control 18 | 150          | 30       | 86.92          | 83.71           | 85.31             | 0.550213  | 0.680987   | 645                        | 1168.3                      | 523.3                  |
| Control 19 | 150          | 30       | 84.01          | 89.91           | 86.96             | 0.583881  | 0.494388   | 891.7                      | 1442.2                      | 550.5                  |
| Control 20 | 150          | 30       | 86.79          | 84.92           | 85.86             | 0.549446  | 0.750539   | 904.9                      | 1410                        | 505.1                  |
| Control 21 | 150          | 30       | 91.54          | 85.8            | 88.67             | 0.482099  | 0.42957    | 773.6                      | 1359                        | 585.4                  |
| Control 22 | 150          | 30       | 84.68          | 74.39           | 79.53             | 0.456646  | 0.736473   | 594.5                      | 1248.7                      | 654.2                  |
| Control 23 | 150          | 30       | 84.68          | 74.39           | 79.53             | 0.456646  | 0.736473   | 594.5                      | 1248.7                      | 654.2                  |
| Control 24 | 150          | 30       | 87.58          | 86.26           | 86.92             | 0.463302  | 0.402646   | 589.7                      | 1086.4                      | 496.7                  |
| Control 25 | 150          | 30       | 84.19          | 84.06           | 84.13             | 0.547089  | 0.610272   | 852.6                      | 1474.3                      | 621.7                  |
| Control 26 | 150          | 30       | 70.56          | 88.33           | 79.45             | 0.658208  | 0.357399   | 925.2                      | 1468                        | 542.8                  |
| Control 27 | 150          | 30       | 84.37          | 83.14           | 83.75             | 0.518101  | 0.401601   | 763.4                      | 1325.9                      | 562.5                  |
| Control 28 | 150          | 30       | 82.36          | 89.83           | 86.1              | 0.376411  | 0.408793   | 759.7                      | 1296.1                      | 536.4                  |
| Control 29 | 150          | 30       | 83.6           | 81.35           | 82.48             | 0.372576  | 0.436523   | 513.8                      | 1036.9                      | 523.1                  |

|              |     |    |       |       |       |          |          |       |        |       |
|--------------|-----|----|-------|-------|-------|----------|----------|-------|--------|-------|
| Control 30   | 150 | 30 | 73.39 | 81.77 | 77.58 | 0.632031 | 0.771649 | 382.6 | 963.5  | 580.9 |
| Con +2m<br>1 | 0   | 0  | 75.21 | 69.37 | 72.29 | 0.53192  | 0.465399 | 742   | 1313.3 | 571.3 |
| Con +2m<br>2 | 0   | 0  | 73.49 | 72.73 | 73.11 | 0.397037 | 0.510373 | 741.8 | 1337.2 | 595.4 |
| Con +2m<br>3 | 0   | 0  | 72.14 | 69.83 | 70.98 | 0.725884 | 0.627183 | 159.6 | 731.2  | 571.6 |
| Con +2m<br>4 | 0   | 0  | 80.03 | 82.62 | 81.33 | 0.299554 | 0.275581 | 502.8 | 1046.3 | 543.5 |
| Con +2m<br>5 | 0   | 0  | 80.3  | 77.23 | 78.76 | 0.655564 | 0.622704 | 470.1 | 1094.8 | 624.7 |
| Con +2m<br>6 | 0   | 0  | 81.06 | 71.89 | 76.48 | 0.512219 | 0.640738 | 828.9 | 1420.6 | 591.7 |
| Con +2m<br>7 | 0   | 0  | 75.48 | 91.58 | 83.53 | 0.516754 | 0.530951 | 767.5 | 1429.4 | 661.9 |
| Con +2m<br>8 | 0   | 0  | 63.46 | 63.83 | 63.65 | 0.731728 | 0.932178 | 359.9 | 728    | 368.1 |
| Con +2m<br>9 | 0   | 0  | 76.56 | 74.32 | 75.44 | 0.677139 | 0.622672 | 384.9 | 908.2  | 523.3 |
| Con+2m<br>10 | 0   | 0  | 83.02 | 70.42 | 76.72 | 0.554129 | 0.51438  | 456   | 1026.6 | 570.6 |
| Con+2m<br>11 | 0   | 0  | 80.48 | 76.6  | 78.54 | 0.491247 | 0.758197 | 506.7 | 1109.5 | 602.8 |
| Con+2m<br>12 | 0   | 0  | 86.77 | 72.2  | 79.49 | 0.663941 | 0.677776 | 857.3 | 1540.9 | 683.6 |
| Con+2m<br>13 | 0   | 0  | 86.01 | 73.45 | 79.73 | 0.497138 | 0.513885 | 857.6 | 1539.3 | 681.7 |
| Con+2m<br>14 | 0   | 0  | 82.97 | 81.26 | 82.11 | 0.461536 | 0.527755 | 799.4 | 1439   | 639.6 |
| Con+2m<br>15 | 0   | 0  | 84.54 | 71.28 | 77.91 | 0.634909 | 0.964354 | 462.4 | 1155.1 | 692.7 |
| Con+2m<br>16 | 0   | 0  | 75.93 | 83.05 | 79.49 | 0.937317 | 0.605896 | 447.8 | 1104.8 | 657   |
| Con+2m<br>17 | 0   | 0  | 70.07 | 79.44 | 74.75 | 0.496673 | 0.617058 | 599.7 | 1182.2 | 582.5 |
| Con+2m<br>18 | 0   | 0  | 81.94 | 93.49 | 87.71 | 0.465974 | 0.456682 | 636.4 | 1166   | 529.6 |
| Con+2m<br>19 | 0   | 0  | 76.56 | 83.54 | 80.05 | 0.484237 | 0.539353 | 890.3 | 1491.1 | 600.8 |
| Con+2m<br>20 | 0   | 0  | 80.97 | 79.89 | 80.43 | 0.770941 | 0.439167 | 880.5 | 1408.8 | 528.3 |
| Con+2m<br>21 | 0   | 0  | 77.31 | 85.57 | 81.44 | 0.436531 | 0.509863 | 739.9 | 1355   | 615.1 |
| Con+2m<br>22 | 0   | 0  | 86.22 | 75.48 | 80.85 | 1.026728 | 0.498289 | 547.9 | 1232.8 | 684.9 |
| Con+2m<br>23 | 0   | 0  | 86.22 | 75.48 | 80.85 | 1.026728 | 0.498289 | 547.9 | 1232.8 | 684.9 |

|              |     |    |       |       |       |          |          |        |        |       |
|--------------|-----|----|-------|-------|-------|----------|----------|--------|--------|-------|
| Con+2m<br>24 | 0   | 0  | 75.06 | 77.53 | 76.3  | 0.568189 | 0.42144  | 578.3  | 1096.3 | 518   |
| Con+2m<br>25 | 0   | 0  | 87.52 | 74.65 | 81.08 | 0.547719 | 0.749589 | 827.8  | 1491.3 | 663.5 |
| Con+2m<br>26 | 0   | 0  | 71.63 | 76.7  | 74.17 | 0.443519 | 0.435243 | 907.4  | 1478.3 | 570.9 |
| Con+2m<br>27 | 0   | 0  | 72.16 | 77.57 | 74.87 | 0.539896 | 0.586258 | 751    | 1349   | 598   |
| Con+2m<br>28 | 0   | 0  | 86.25 | 75.26 | 80.76 | 0.943411 | 0.65544  | 728.9  | 1310.7 | 581.8 |
| Con+2m<br>29 | 0   | 0  | 82.28 | 82.01 | 82.15 | 0.336487 | 0.502465 | 514.9  | 1038.2 | 523.3 |
| Con+2m<br>30 | 0   | 0  | 73.34 | 77.72 | 75.53 | 0.581348 | 0.451839 | 367.9  | 1020.3 | 652.4 |
| ExCu 1       | 150 | 30 | 87.67 | 89.45 | 88.56 | 0.368927 | 0.41212  | 581.2  | 1124.4 |       |
| ExCu 2       | 150 | 30 | 78.66 | 83.54 | 81.1  | 0.447291 | 0.378119 | 605.7  | 1202.3 | 596.6 |
| ExCu 3       | 150 | 30 | 70.51 | 76.99 | 73.75 | 0.397363 | 0.403778 | 602.6  | 1226.4 | 623.8 |
| ExCu 4       | 150 | 30 | 86.3  | 86.25 | 86.28 | 0.768058 | 0.593708 | 723.5  | 1314.2 | 590.7 |
| ExCu 5       | 150 | 30 | 79.38 | 87.1  | 83.24 | 0.518445 | 0.476366 | 694.9  | 1286.1 | 591.2 |
| ExCu 6       | 150 | 30 | 76.14 | 80.29 | 78.21 | 0.611483 | 0.528078 | 727.7  | 1287.6 | 559.9 |
| ExCu 7       | 150 | 30 | 88.26 | 93.75 | 91    | 0.491935 | 0.421094 | 716.1  | 1214.7 | 498.6 |
| ExCu 8       | 150 | 30 | 84.02 | 89.28 | 86.65 | 0.585124 | 0.758841 | 779.8  | 1332.2 | 552.4 |
| ExCu 9       | 150 | 30 | 87.71 | 83.87 | 85.79 | 0.398943 | 0.626584 | 732    | 1230.8 | 498.8 |
| ExCu 10      | 150 | 30 | 76.61 | 78.8  | 77.7  | 0.884486 | 0.754057 | 1066.7 | 1641.4 | 574.7 |
| ExCu 11      | 150 | 30 | 77.94 | 82.97 | 80.45 | 0.716889 | 0.83245  | 1018.8 | 1563.4 | 544.6 |
| ExCu 12      | 150 | 30 | 73.22 | 74.39 | 73.8  | 0.413098 | 0.598473 | 615.6  | 1423.3 | 807.7 |
| ExCu 13      | 150 | 30 | 89.43 | 80.53 | 84.98 | 0.573074 | 0.61201  | 681.1  | 1231.2 | 550.1 |
| ExCu 14      | 150 | 30 | 81.69 | 81.26 | 81.48 | 0.708399 | 0.415703 | 435.1  | 1126.8 | 691.7 |
| ExCu 15      | 150 | 30 | 81.69 | 81.26 | 81.48 | 0.708399 | 0.415703 | 435.1  | 1126.8 | 691.7 |
| ExCu 16      | 150 | 30 | 69.88 | 70.94 | 70.41 | 0.633375 | 0.8279   | 593.3  | 1248.9 | 655.6 |
| ExCu 17      | 150 | 30 | 82.57 | 81.02 | 81.79 | 0.599367 | 0.9073   | 603.9  | 1138.4 | 534.5 |
| ExCu 18      | 150 | 30 | 88.58 | 87.69 | 88.14 | 0.878764 | 0.542712 | 617.6  | 1135.9 | 518.3 |
| ExCu 19      | 150 | 30 | 82.16 | 87.65 | 84.9  | 0.712599 | 0.709913 | 488.9  | 991.9  | 503   |
| ExCu 20      | 150 | 30 | 60.18 | 67.75 | 63.97 | 1.2291   | 0.735751 | 715.9  | 1332.4 | 616.5 |
| ExCu 21      | 150 | 30 | 75.8  | 78.5  | 77.15 | 0.651061 | 0.616079 | 742.9  | 1325.5 | 582.6 |
| ExCu 22      | 150 | 30 | 67.55 | 62.03 | 64.79 | 0.672838 | 0.730156 | 542.1  | 1191.4 | 649.3 |
| ExCu 23      | 150 | 30 | 77.04 | 88.36 | 82.7  | 0.61585  | 0.226974 | 648.8  | 1222.3 | 573.5 |
| ExCu 24      | 150 | 30 | 77.77 | 76.67 | 77.22 | 0.458632 | 0.611832 | 619.5  | 1156.6 | 537.1 |
| ExCu 25      | 150 | 30 | 73.8  | 80.91 | 77.35 | 0.98477  | 0.389705 | 671.4  | 1265.5 | 594.1 |
| ExCu 26      | 150 | 30 | 88.38 | 87.33 | 87.85 | 0.492677 | 0.519108 | 428.9  | 890.4  | 461.5 |
| ExCu 27      | 150 | 30 | 78.51 | 73.76 | 76.13 | 0.409343 | 0.537915 | 1155.2 | 1738.1 | 582.9 |
| ExCu 28      | 150 | 30 | 93.12 | 94.52 | 93.82 | 0.824345 | 0.578743 | 620.7  | 1076.4 | 455.7 |
| ExCu 29      | 150 | 30 | 79.91 | 75.25 | 77.58 | 0.445181 | 0.387352 | 443    | 991.8  | 548.8 |
| ExCu 30      | 150 | 30 | 72.37 | 66.31 | 69.34 | 0.592855 | 0.386979 | 547.1  | 1179.6 | 632.5 |
| ExCu+2m<br>1 | 0   | 0  | 85.12 | 88.62 | 86.87 | 0.337721 | 0.500362 | 557.2  | 1151.3 | 594.1 |

|               |   |   |       |       |       |          |          |        |        |       |
|---------------|---|---|-------|-------|-------|----------|----------|--------|--------|-------|
| ExCu+2m<br>2  | 0 | 0 | 67.26 | 73.05 | 70.16 | 0.427472 | 0.607546 | 604.3  | 1272.3 | 668   |
| ExCu+2m<br>3  | 0 | 0 | 66.21 | 69.53 | 67.87 | 0.404765 | 0.392495 | 599.5  | 1228.2 | 628.7 |
| ExCu+2m<br>4  | 0 | 0 | 72.54 | 67.1  | 69.82 | 0.372574 | 0.562609 | 728.8  | 1327.8 | 599   |
| ExCu+2m<br>5  | 0 | 0 | 72.27 | 73.19 | 72.73 | 0.427948 | 0.543456 | 687.3  | 1307.8 | 620.5 |
| ExCu+2m<br>6  | 0 | 0 | 72.17 | 64.11 | 68.14 | 0.454322 | 2.979988 | 704.6  | 1314.2 | 609.6 |
| ExCu+2m<br>7  | 0 | 0 | 91.9  | 90.07 | 90.99 | 0.948004 | 0.468379 | 717.2  | 1209.9 | 492.7 |
| ExCu+2m<br>8  | 0 | 0 | 73.93 | 81.69 | 77.81 | 0.379273 | 0.34343  | 778.6  | 1373.9 | 595.3 |
| ExCu+2m<br>9  | 0 | 0 | 72.23 | 70.77 | 71.5  | 0.408513 | 0.406542 | 726.1  | 1311.9 | 585.8 |
| ExCu+2m<br>10 | 0 | 0 | 68.66 | 71.58 | 70.12 | 0.50902  | 0.702001 | 1070.5 | 1697.9 | 627.4 |
| ExCu+2m<br>11 | 0 | 0 | 74.58 | 75.64 | 75.11 | 0.525151 | 0.680732 | 1020.7 | 1586.1 | 565.4 |
| ExCu+2m<br>12 | 0 | 0 | 71.82 | 71.74 | 71.78 | 0.547258 | 0.444223 | 591.4  | 1420.6 | 829.2 |
| ExCu+2m<br>13 | 0 | 0 | 84.41 | 75.53 | 79.97 | 0.359067 | 0.449989 | 658.6  | 1239.1 | 580.5 |
| ExCu+2m<br>14 | 0 | 0 | 77.84 | 76.15 | 76.99 | 0.854552 | 0.373336 | 431.7  | 1184.2 | 752.5 |
| ExCu+2m<br>15 | 0 | 0 | 76.67 | 89    | 82.84 | 0.642821 | 0.478071 | 1130.5 | 1640.1 | 509.6 |
| ExCu+2m<br>16 | 0 | 0 | 55.99 | 46.02 | 51.01 | 0.893654 | 0.516513 | 568.3  | 1300.4 | 732.1 |
| ExCu+2m<br>17 | 0 | 0 | 84.75 | 79.55 | 82.15 | 0.985068 | 0.631929 | 607.2  | 1155.8 | 548.6 |
| ExCu+2m<br>18 | 0 | 0 | 79.77 | 80.25 | 80.01 | 0.525917 | 0.794588 | 612.8  | 1137.6 | 524.8 |
| ExCu+2m<br>19 | 0 | 0 | 71.46 | 77.25 | 74.36 | 0.47868  | 0.387913 | 491.6  | 1036.3 | 544.7 |
| ExCu+2m<br>20 | 0 | 0 | 58.1  | 73.32 | 65.71 | 0.811104 | 0.88739  | 673.3  | 1338.8 | 665.5 |
| ExCu+2m<br>21 | 0 | 0 | 64.86 | 60.97 | 62.91 | 0.95815  | 0.659636 | 736.5  | 1378.7 | 642.2 |
| ExCu+2m<br>22 | 0 | 0 | 62.18 | 62.7  | 62.44 | 0.492489 | 0.610604 | 529.2  | 1191   | 661.8 |
| ExCu+2m<br>23 | 0 | 0 | 63.65 | 70.62 | 67.14 | 0.518994 | 0.52296  | 648.8  | 1253.6 | 604.8 |
| ExCu+2m<br>24 | 0 | 0 | 65.4  | 63.29 | 64.34 | 0.404753 | 0.677077 | 552.3  | 1154.5 | 602.2 |

|                 |     |      |       |       |       |          |          |        |        |       |
|-----------------|-----|------|-------|-------|-------|----------|----------|--------|--------|-------|
| ExCu+2m<br>25   | 0   | 0    | 75.84 | 81.14 | 78.49 | 0.783013 | 0.491534 | 413.8  | 909.6  | 495.8 |
| ExCu+2m<br>26   | 0   | 0    | 75.84 | 81.14 | 78.49 | 0.783013 | 0.491534 | 413.8  | 909.6  | 495.8 |
| ExCu+2m<br>27   | 0   | 0    | 70.82 | 60.16 | 65.49 | 0.389935 | 0.630069 | 1153.8 | 1770.4 | 616.6 |
| ExCu+2m<br>28   | 0   | 0    | 83.16 | 76.89 | 80.02 | 0.748276 | 0.694852 | 628.7  | 1095.2 | 466.5 |
| ExCu+2m<br>29   | 0   | 0    | 67.54 | 68.7  | 68.12 | 0.556504 | 0.364692 | 456.5  | 1075.1 | 618.6 |
| ExCu+2m<br>30   | 0   | 0    | 71.94 | 60.21 | 66.08 | 0.327527 | 0.441366 | 550.5  | 1230.5 | 680   |
| Sandblast<br>1  | 200 | 10   | 57.04 | 67.67 | 62.36 | 1.162215 | 0.514741 | 585.3  | 948.5  | 363.2 |
| Sandblast<br>2  | 909 | 30.3 | 65.71 | 61.9  | 63.81 | 0.502744 | 0.433671 | 499.4  | 823.9  | 324.5 |
| Sandblast<br>3  | 150 | 30   | 39.71 | 46.28 | 43    | 0.925379 | 0.934137 | 480.9  | 811.9  | 331   |
| Sandblast<br>4  | 150 | 30   | 64.25 | 65.15 | 64.7  | 0.649034 | 0.733707 | 554.6  | 894.9  | 340.3 |
| Sandblast<br>5  | 150 | 30   | 61.26 | 67.27 | 64.26 | 0.792575 | 0.863868 | 394    | 765    | 371   |
| Sandblast<br>6  | 150 | 30   | 73.51 | 71.35 | 72.43 | 0.952331 | 0.791339 | 442.7  | 787.5  | 344.8 |
| Sandblast<br>7  | 150 | 30   | 58.71 | 56.15 | 57.43 | 0.96637  | 0.777302 | 441.8  | 791.5  | 349.7 |
| Sandblast<br>8  | 150 | 30   | 74.01 | 72.42 | 73.22 | 0.828404 | 0.956702 | 387.5  | 724.1  | 336.6 |
| Sandblast<br>9  | 150 | 30   | 61.13 | 58.58 | 59.85 | 0.814929 | 0.710139 | 426.9  | 769.8  | 342.9 |
| Sandblast<br>10 | 150 | 30   | 67.89 | 74.39 | 71.14 | 0.84759  | 0.331654 | 454.4  | 785.4  | 331   |
| Sandblast<br>11 | 150 | 30   | 77.44 | 68.53 | 72.99 | 0.475638 | 0.506685 | 1141.5 | 1527.6 | 386.1 |
| Sandblast<br>12 | 150 | 30   | 62.73 | 59.06 | 60.89 | 1.127908 | 0.927645 | 449.1  | 949.5  | 500.4 |
| Sandblast<br>13 | 150 | 30   | 64.53 | 43.61 | 54.07 | 0.349683 | 0.43219  | 308.3  | 957.6  | 649.3 |
| Sandblast<br>14 | 150 | 30   | 58.17 | 57.74 | 57.95 | 0.60282  | 0.864183 | 687.7  | 1249.9 | 562.2 |
| Sandblast<br>15 | 150 | 30   | 71    | 66.39 | 68.7  | 0.503005 | 0.947258 | 767.3  | 1282.4 | 515.1 |
| Sandblast<br>16 | 150 | 30   | 65.72 | 39.36 | 52.54 | 0.980965 | 0.743374 | 901.7  | 1483.1 | 581.4 |
| Sandblast<br>17 | 150 | 30   | 36.15 | 33.59 | 34.87 | 0.674839 | 0.271688 | 817.5  | 1479   | 661.5 |

|                    |     |    |       |       |       |          |          |        |        |       |
|--------------------|-----|----|-------|-------|-------|----------|----------|--------|--------|-------|
| Sandblast<br>18    | 150 | 30 | 54.37 | 58.16 | 56.26 | 0.847257 | 0.878164 | 649.8  | 1325   | 675.2 |
| Sandblast<br>19    | 150 | 30 | 65.72 | 68.09 | 66.91 | 0.457912 | 0.912987 | 905.5  | 1550.5 | 645   |
| Sandblast<br>20    | 150 | 30 | 48.56 | 51.95 | 50.26 | 0.472799 | 0.473267 | 841.1  | 1499.9 | 658.8 |
| Sandblast<br>21    | 150 | 30 | 70.73 | 69.16 | 69.95 | 0.364799 | 0.881328 | 770.9  | 1397.5 | 626.6 |
| Sandblast<br>22    | 150 | 30 | 76.29 | 83.14 | 79.72 | 0.891258 | 0.957009 | 1135.8 | 1696.8 | 561   |
| Sandblast<br>23    | 150 | 30 | 62.43 | 66.87 | 64.65 | 0.481193 | 0.858958 | 837.4  | 1613   | 775.6 |
| Sandblast<br>24    | 150 | 30 | 51.06 | 57.13 | 54.09 | 0.750833 | 0.84498  | 703.3  | 1361.5 | 658.2 |
| Sandblast<br>25    | 150 | 30 | 51.24 | 48.2  | 49.72 | 0.646575 | 0.905605 | 818    | 1576   | 758   |
| Sandblast<br>26    | 150 | 30 | 71.2  | 67.92 | 69.56 | 0.72471  | 0.979322 | 622.1  | 1239.5 | 617.4 |
| Sandblast<br>27    | 150 | 30 | 67.67 | 60.69 | 64.18 | 0.539551 | 0.901943 | 683.7  | 1300.7 | 617   |
| Sandblast<br>28    | 150 | 30 | 50.89 | 50.14 | 50.52 | 0.979847 | 0.873059 | 649.7  | 1246.6 | 596.9 |
| Sandblast<br>29    | 150 | 30 | 33.84 | 40.53 | 37.18 | 0.88036  | 0.883165 | 832.1  | 1215.9 | 383.8 |
| Sandblast<br>30    | 150 | 30 | 56.38 | 57.32 | 56.85 | 0.952585 | 0.688121 | 813.8  | 1435.8 | 622   |
| 30sec (31)         | 150 | 30 | 26.57 | 30.79 | 28.68 | 0.475029 | 0.690311 | 705.9  | 1291.7 | 585.8 |
| 30sec +<br>2m (31) | 0   | 0  | 21.34 | 28.12 | 24.73 | 0.562275 | 0.558531 | 709.4  | 1341   | 631.6 |
| Sandblast<br>+2m 1 | 0   | 0  | 42.64 | 39.12 | 40.88 | 0.415211 | 0.451288 | 544.9  | 930.6  | 385.7 |
| Sandblast<br>+2m 2 | 0   | 0  | 61.42 | 62.61 | 62.01 | 0.512342 | 0.400434 | 495.3  | 822.5  | 327.2 |
| Sandblast<br>+2m 3 | 0   | 0  | 48.03 | 40.12 | 44.07 | 0.680037 | 1.062839 | 472.1  | 819    | 346.9 |
| Sandblast<br>+2m 4 | 0   | 0  | 63.92 | 59.55 | 61.74 | 0.817468 | 0.901831 | 553.3  | 893.9  | 340.6 |
| Sandblast<br>+2m 5 | 0   | 0  | 60.46 | 57.23 | 58.84 | 0.895896 | 0.927998 | 382.4  | 763.8  | 381.4 |
| Sandblast<br>+2m 6 | 0   | 0  | 55.75 | 49.55 | 52.65 | 0.911719 | 0.884192 | 405    | 803.5  | 398.5 |
| Sandblast<br>+2m 7 | 0   | 0  | 47.45 | 38.59 | 43.02 | 0.849437 | 0.738205 | 431.1  | 802.6  | 371.5 |
| Sandblast<br>+2m 8 | 0   | 0  | 63.46 | 63.83 | 63.65 | 0.731728 | 0.932178 | 359.9  | 728    | 368.1 |

|                     |   |   |       |       |       |          |          |        |        |       |
|---------------------|---|---|-------|-------|-------|----------|----------|--------|--------|-------|
| Sandblast<br>+2m 9  | 0 | 0 | 47.82 | 52.78 | 50.3  | 0.935904 | 0.923311 | 416.2  | 777.1  | 360.9 |
| Sandblast<br>+2m 10 | 0 | 0 | 65.98 | 66.64 | 66.31 | 0.942131 | 0.927531 | 452.5  | 807.1  | 354.6 |
| Sandblast<br>+2m 11 | 0 | 0 | 59.73 | 59.96 | 59.85 | 0.633709 | 0.604253 | 1129.8 | 1535.2 | 405.4 |
| Sandblast<br>+2m 12 | 0 | 0 | 50.13 | 61.41 | 55.77 | 0.66661  | 0.733038 | 442.6  | 944.7  | 502.1 |
| Sandblast<br>+2m 13 | 0 | 0 | 36.46 | 21.44 | 28.95 | 0.618465 | 0.645121 | 297    | 957.4  | 660.4 |
| Sandblast<br>+2m 14 | 0 | 0 | 47.49 | 46.71 | 47.1  | 0.774236 | 0.711587 | 415.8  | 816.9  | 401.1 |
| Sandblast<br>+2m 15 | 0 | 0 | 66.1  | 62.74 | 64.42 | 0.605008 | 0.397789 | 772    | 1290.2 | 518.2 |
| Sandblast<br>+2m 16 | 0 | 0 | 47.18 | 45.15 | 46.17 | 0.477138 | 0.626414 | 898    | 1482.1 | 584.1 |
| Sandblast<br>+2m 17 | 0 | 0 | 33.98 | 27.44 | 30.71 | 0.53536  | 0.902272 | 816.2  | 1478.5 | 662.3 |
| Sandblast<br>+2m 18 | 0 | 0 | 54.84 | 55.39 | 55.12 | 0.959298 | 0.92204  | 637.7  | 1340.4 | 702.7 |
| Sandblast<br>+2m 19 | 0 | 0 | 42.11 | 42.15 | 42.13 | 0.96788  | 0.565699 | 881.4  | 1590.3 | 708.9 |
| Sandblast<br>+2m 20 | 0 | 0 | 32.45 | 40.1  | 36.27 | 0.407025 | 0.400437 | 726.6  | 1492.5 | 765.9 |
| Sandblast<br>+2m 21 | 0 | 0 | 60.22 | 58.72 | 59.47 | 0.578698 | 0.868932 | 746.5  | 1394.4 | 647.9 |
| Sandblast<br>+2m 22 | 0 | 0 | 64.16 | 65.8  | 64.98 | 0.56205  | 0.620357 | 1138.5 | 1737.7 | 599.2 |
| Sandblast<br>+2m 23 | 0 | 0 | 49.69 | 54.86 | 52.28 | 0.608057 | 0.694027 | 781    | 1600.8 | 819.8 |
| Sandblast<br>+2m 24 | 0 | 0 | 49.01 | 45.4  | 47.2  | 0.58054  | 0.777294 | 717.3  | 1447.4 | 730.1 |
| Sandblast<br>+2m 25 | 0 | 0 | 46.04 | 47.12 | 46.58 | 0.65295  | 0.953882 | 820.9  | 1597.6 | 776.7 |
| Sandblast<br>+2m 26 | 0 | 0 | 66.26 | 60.99 | 63.63 | 0.448341 | 0.846982 | 620.3  | 1232.5 | 612.2 |
| Sandblast<br>+2m 27 | 0 | 0 | 66.94 | 61.92 | 64.43 | 3.264503 | 0.541062 | 680.9  | 1302   | 621.1 |
| Sandblast<br>+2m 28 | 0 | 0 | 53.74 | 37.52 | 45.63 | 0.904016 | 0.914497 | 641.3  | 1255.4 | 614.1 |
| Sandblast<br>+2m 29 | 0 | 0 | 29.28 | 41.6  | 35.44 | 0.494512 | 0.618198 | 838.7  | 1212.7 | 374   |
| Sandblast<br>+2m 30 | 0 | 0 | 51.79 | 48.62 | 50.21 | 0.701624 | 0.623098 | 818.5  | 1439   | 620.5 |



**Table S3:** The contact angles for each sample of the 3 groups and after the 2 minutes wait, the averages, STDEV, and T-test. STDEV: standard deviation

|                        | control  | Control+2m | ExtraCure   | ExtraCure+2m | AirPolish   | AirPolish+2m |
|------------------------|----------|------------|-------------|--------------|-------------|--------------|
| Sample 1               | 84.78    | 72.29      | 88.56       | 86.87        | 62.36       | 40.88        |
| Sample 2               | 72.54    | 73.11      | 81.1        | 70.16        | 63.81       | 62.01        |
| Sample 3               | 77.21    | 70.98      | 73.75       | 67.87        | 43          | 44.07        |
| Sample 4               | 77.36    | 81.33      | 86.28       | 69.82        | 64.7        | 61.74        |
| Sample 5               | 81.78    | 78.76      | 83.24       | 72.73        | 64.26       | 58.84        |
| Sample 6               | 75.71    | 76.48      | 78.21       | 68.14        | 72.43       | 52.65        |
| Sample 7               | 78.3     | 83.53      | 91          | 90.99        | 57.43       | 43.02        |
| Sample 8               | 82.74    | 63.65      | 86.65       | 77.81        | 73.22       | 63.65        |
| Sample 9               | 82.85    | 75.44      | 85.79       | 71.5         | 59.85       | 50.3         |
| Sample 10              | 83.32    | 76.72      | 77.7        | 70.12        | 71.14       | 66.31        |
| Sample 11              | 85.4     | 78.54      | 80.45       | 75.11        | 72.99       | 59.85        |
| Sample 12              | 87.05    | 79.49      | 73.8        | 71.78        | 60.89       | 55.77        |
| Sample 13              | 78.4     | 79.73      | 84.98       | 79.97        | 54.07       | 28.95        |
| Sample 14              | 83.86    | 82.11      | 81.48       | 76.99        | 57.95       | 47.1         |
| Sample 15              | 77.94    | 77.91      | 81.48       | 82.84        | 68.7        | 64.42        |
| Sample 16              | 79.57    | 79.49      | 70.41       | 51.01        | 52.54       | 46.17        |
| Sample 17              | 82.24    | 74.75      | 81.79       | 82.15        | 34.87       | 30.71        |
| Sample 18              | 85.31    | 87.71      | 88.14       | 80.01        | 56.26       | 55.12        |
| Sample 19              | 86.96    | 80.05      | 84.9        | 74.36        | 66.91       | 42.13        |
| Sample 20              | 85.86    | 80.43      | 63.97       | 65.71        | 50.26       | 36.27        |
| Sample 21              | 88.67    | 81.44      | 77.15       | 62.91        | 69.95       | 59.47        |
| Sample 22              | 79.53    | 80.85      | 64.79       | 62.44        | 79.72       | 64.98        |
| Sample 23              | 79.53    | 80.85      | 82.7        | 67.14        | 64.65       | 52.28        |
| Sample 24              | 86.92    | 76.3       | 77.22       | 64.34        | 54.09       | 47.2         |
| Sample 25              | 84.13    | 81.08      | 77.35       | 78.49        | 49.72       | 46.58        |
| Sample 26              | 79.45    | 74.17      | 87.85       | 78.49        | 69.56       | 63.63        |
| Sample 27              | 83.75    | 74.87      | 76.13       | 65.49        | 64.18       | 64.43        |
| Sample 28              | 86.1     | 80.76      | 93.82       | 80.02        | 50.52       | 45.63        |
| Sample 29              | 82.48    | 82.15      | 77.58       | 68.12        | 37.18       | 35.44        |
| Sample 30              | 77.58    | 75.53      | 69.34       | 66.08        | 56.85       | 50.21        |
| Average                | 81.91067 | 78.01667   | 80.25366667 | 72.64867     | 60.13533333 | 51.327       |
| STDEV                  | 3.897566 | 4.471768   | 7.135848692 | 8.191833     | 10.51452447 | 10.5689      |
| T-test                 | 0.138089 |            | 7.06279E-10 |              | 1.97099E-11 |              |
| T-test with each's +2m | 0.000808 |            | 0.000385052 |              | 0.002352417 |              |
